# Supplementary material
Source: PubMed Central journal article supplement (PMC9123284)
Supplement: NIHMS1767358-supplement-2.pdf [file NIHMS1767358-supplement-2.pdf]

Rosenberg et al. Supplemental Figure 1

a.

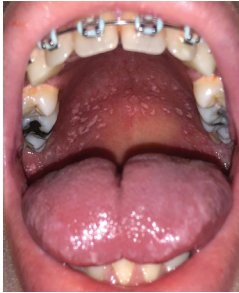

b.

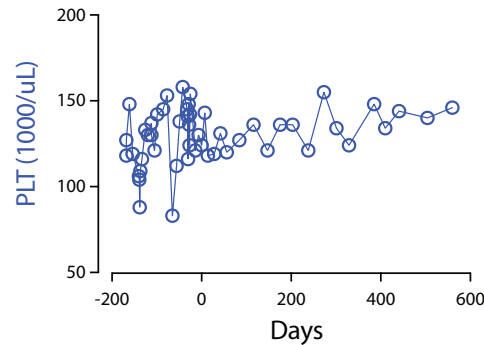

c.

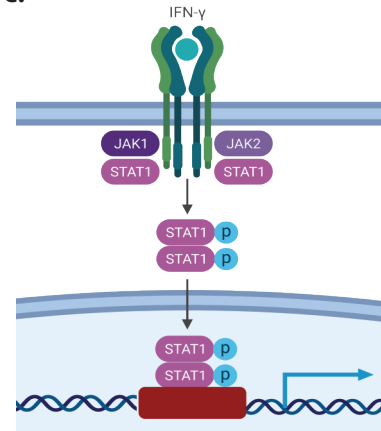

d.

|                                            | Reference Range | Presentation Value                       | Nadir Value  |
|--------------------------------------------|-----------------|------------------------------------------|--------------|
| <b>Hematology</b>                          |                 |                                          |              |
| Hemoglobin (g/dl)                          | 12.0–16.0       | 3.9                                      | 3.9          |
| Mean corpuscular volume (fL)               | 80–94           | 80                                       | 80           |
| Hematocrit (%)                             | 36.0–46.0       | 11.4                                     | 11.4         |
| Reticulocytes (%)                          | 0.5–2.5         | Undetectable                             | Undetectable |
| White-cell count (per $\mu$ l)             | 4500–11,000     | 0.9                                      | 0.6          |
| Differential count (%)                     |                 |                                          |              |
| Neutrophils                                | 40–70           | 39                                       |              |
| Lymphocytes                                | 22–44           | 41                                       |              |
| Monocytes                                  | 4–11            | 19                                       |              |
| Eosinophils                                | 0–8             | 0                                        |              |
| Platelet count (per $\mu$ l)               | 150,000–400,000 | 118,000                                  | 83,000       |
| <b>Chemistries</b>                         |                 |                                          |              |
| Sodium (mmol/liter)                        | 135–145         | 141                                      |              |
| Potassium (mmol/liter)                     | 3.4–5.0         | 3.6                                      |              |
| Chloride (mmol/liter)                      | 98–108          | 103                                      |              |
| Carbon dioxide (mmol/liter)                | 23–32           | 29                                       |              |
| Urea nitrogen (mg/dl)                      | 8–25            | 17                                       |              |
| Creatinine (mg/dl)                         | 0.60–1.50       | 0.74                                     |              |
| Glucose (mg/dl)                            | 70–110          | 107                                      |              |
| Iron Saturation (%)                        | 14–50           | 96%                                      |              |
| Total iron binding capacity (ug/dL)        | 230–404         | 230                                      |              |
| Ferritin (ug/L)                            | 20–300          | 651                                      |              |
| Folate (ng/mL)                             | >4.7            | 11.5                                     |              |
| Vitamin B12 (pg/mL)                        | >231            | 864                                      |              |
| Lactate dehydrogenase (IU/liter)           | 110–210         | 157                                      |              |
| Alanine aminotransferase (U/liter)         | 10–55           | 32                                       |              |
| Aspartate aminotransferase (U/liter)       | 10–40           | 20                                       |              |
| Bilirubin (mg/dl)                          |                 |                                          |              |
| Total                                      | 0.0–1.0         | 0.5                                      |              |
| Direct                                     | 0.0–0.4         | <0.2                                     |              |
| <b>Infectious Workup</b>                   |                 |                                          |              |
| Human Immunodeficiency Virus               |                 | negative                                 |              |
| Parvovirus                                 |                 | IgM negative, IgG positive, PCR negative |              |
| Hepatitis B Virus                          |                 | Immune                                   |              |
| Hepatitis C Virus antibody                 |                 | negative                                 |              |
| Cytomegalovirus                            |                 | IgM negative, IgG positive               |              |
| Epstein Barr Virus Viral Capsid Antigen    |                 | IgM negative, IgG positive, PCR negative |              |
| Serum Protein Electrophoresis              |                 | Normal                                   |              |
| <b>Rheumatologic Workup</b>                |                 |                                          |              |
| Antinuclear Antibody                       |                 | 1:160                                    |              |
| anti-dsDNA antibody                        |                 | negative                                 |              |
| anti-Smith antibody                        |                 | negative                                 |              |
| anti-Ro antibody                           |                 | negative                                 |              |
| anti-La antibody                           |                 | negative                                 |              |
| anti-ribonucleoprotein antibody            |                 | negative                                 |              |
| anti-neutrophil cytoplasmic antibody       |                 | negative                                 |              |
| anti-cyclic citrullinated protein antibody |                 | negative                                 |              |
| Rheumatoid factor                          |                 | negative                                 |              |
| Celiac autoantibody panel                  |                 | negative                                 |              |

Supplemental Figure 1: Additional clinical parameters, related to Figure 1

- a. The patient's chronic mucocutaneous candidiasis.
- b. The patient's platelet counts over time.
- c. Schematic of JAK-STAT signaling showing interferon- $\gamma$  binding its receptor, activating JAK1 and JAK2 to phosphorylate STAT1. STAT1 dimerizes, translocates to the nucleus, and activates target genes.
- d. Laboratory values as part of an infectious and rheumatologic workup of pancytopenia.

Rosenberg et al. Supplemental Figure 2

a.

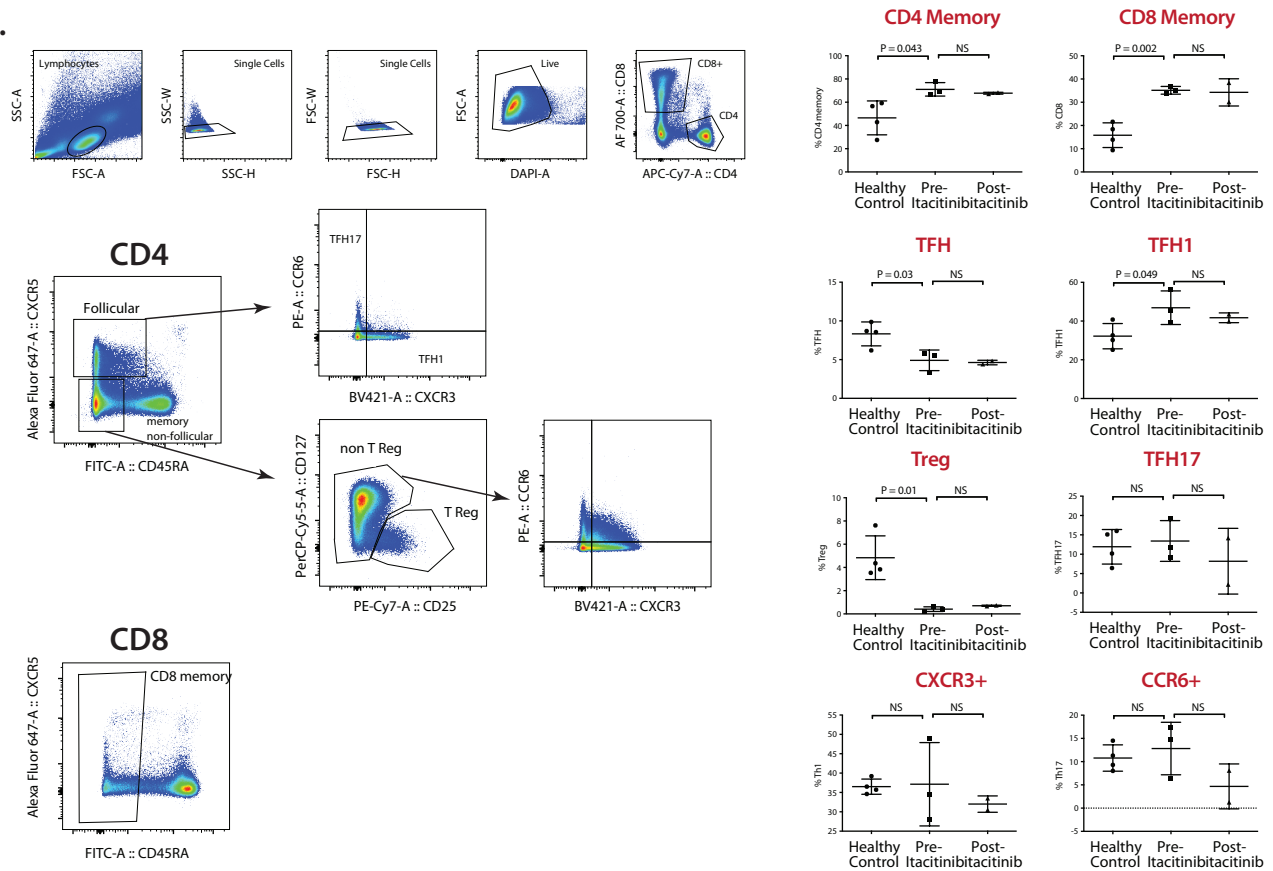

b.

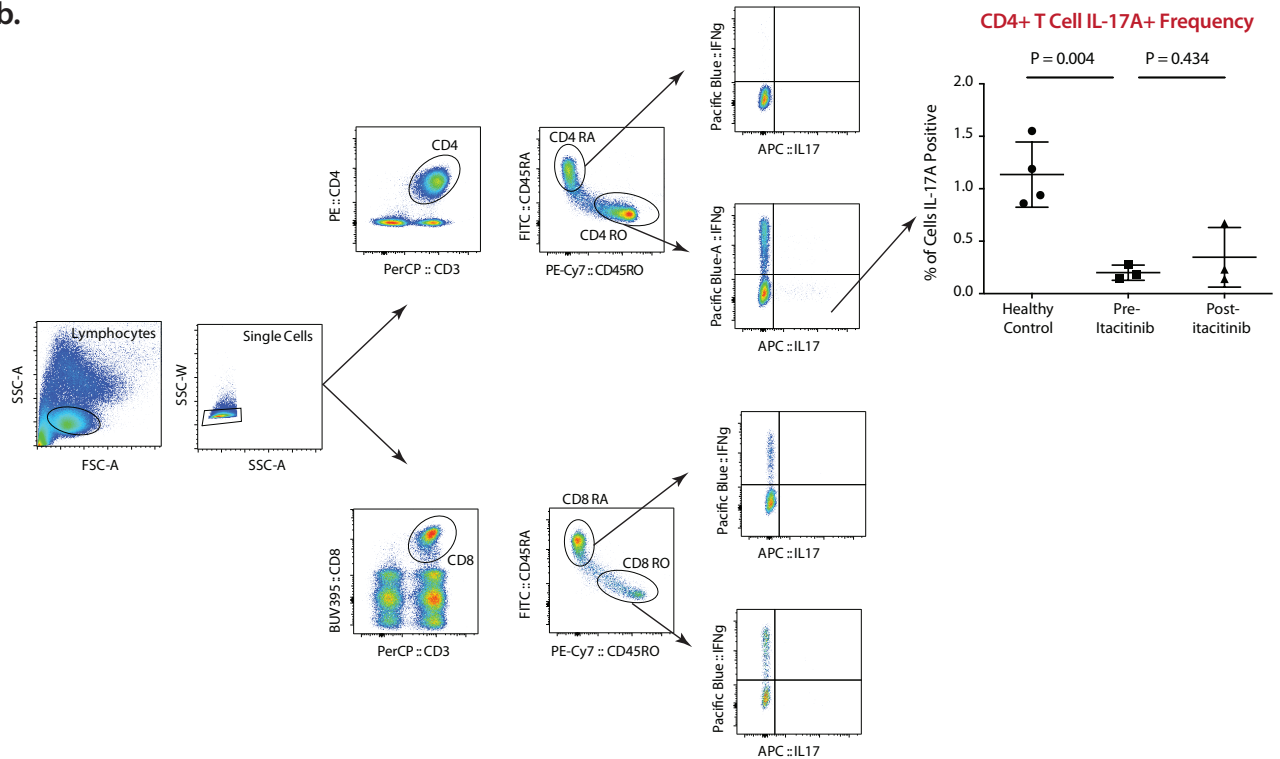

Supplemental Figure 2: Immunophenotyping, related to Figure 2

- a. Flow cytometric immunophenotyping gating strategy is shown (left). Cell type frequencies for each cell type are plotted by condition (healthy controls, pre-itacitinib, or post-itacitinib) (right).
- b. Flow cytometric intracellular cytokine staining gating strategy is shown (left). Memory CD4+ T cell IL-17A-secreting cell frequencies are plotted (right). CD4+ T cell interferon- $\gamma$ -secreting frequencies are found in Figure 2 of the main manuscript, as are CD8+ T cell interferon- $\gamma$ -secreting frequencies. All P values are calculated using unpaired t-test.

a.

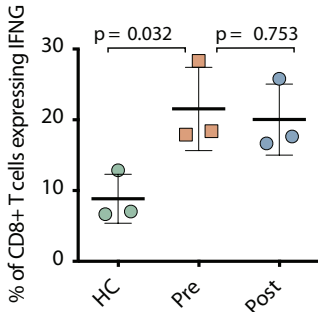

b.

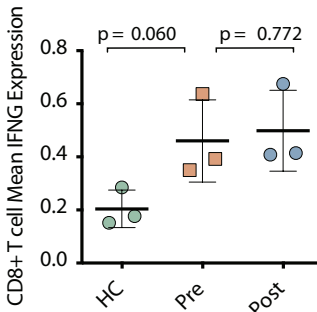

c.

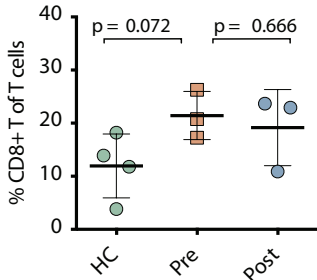

d.

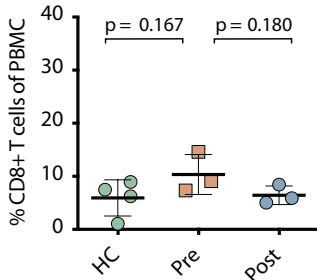

e.

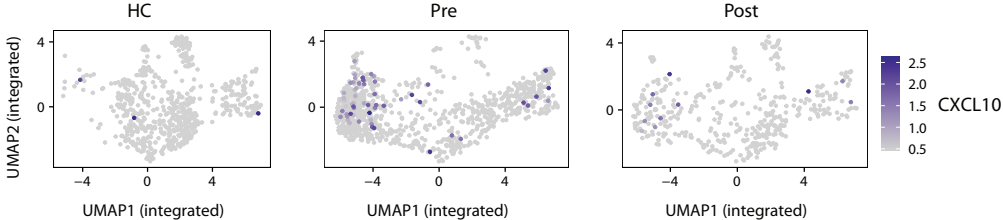

f.

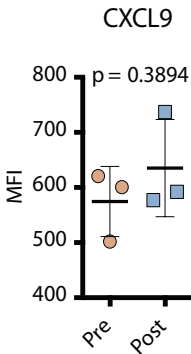

g.

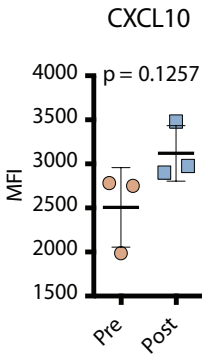

Supplemental Figure 3: Single-cell RNA-sequencing cell function and frequency, and additional plasma cytokine concentrations, related to Figure 3

- a. For all samples with at least 15 CD8+ cells, the percent of CD8+ T cells expressing interferon- $\gamma$  is plotted. For HC n = 3, pre-itacitinib n = 3, and post-itacitinib n = 3.
- b. Mean interferon- $\gamma$  transcript levels are plotted as in a.
- c. Using single cell RNA-sequencing, for each time point as described in Figure 2, the number of cells in the CD8+ T cell cluster was divided by the total number of cells in that time point's T cell-containing cluster or
- d. divided by the total number of PBMC sequenced. The percentage was then plotted, and p-values determined by unpaired t-test. For HC n = 4, pre-itacitinib n = 3, and post-itacitinib n = 3. All P values calculated using unpaired t test.
- e. Expression of CXCL10 is plotted by condition. For HC n = 4, pre-itacitinib n = 3, and post-itacitinib n = 3.
- f.-g. Plasma cytokine levels measured in units of mean fluorescent intensity (MFI) from the patient at six time points pre- and post-itacitinib.

Rosenberg et al. Supplemental Methods Figure 1

**a.**

| Sample            | UMI (median) | Genes Detected (median) | # of Cells | Sample            | UMI (median) | Genes Detected (median) | # of Cells |
|-------------------|--------------|-------------------------|------------|-------------------|--------------|-------------------------|------------|
| Healthy Control 1 | 1072         | 685                     | 595        | Pre-itacitinib 1  | 2142.5       | 1195.5                  | 754        |
| Healthy Control 2 | 1014         | 668                     | 179        | Pre-itacitinib 2  | 1630         | 952                     | 639        |
| Healthy Control 3 | 1117.5       | 699                     | 814        | Pre-itacitinib 3  | 1648         | 995                     | 721        |
| Healthy Control 4 | 794          | 538                     | 607        | Post-itacitinib 1 | 1144         | 748                     | 577        |
|                   |              |                         |            | Post-itacitinib 2 | 786          | 573                     | 259        |
|                   |              |                         |            | Post-itacitinib 3 | 1274         | 796                     | 165        |

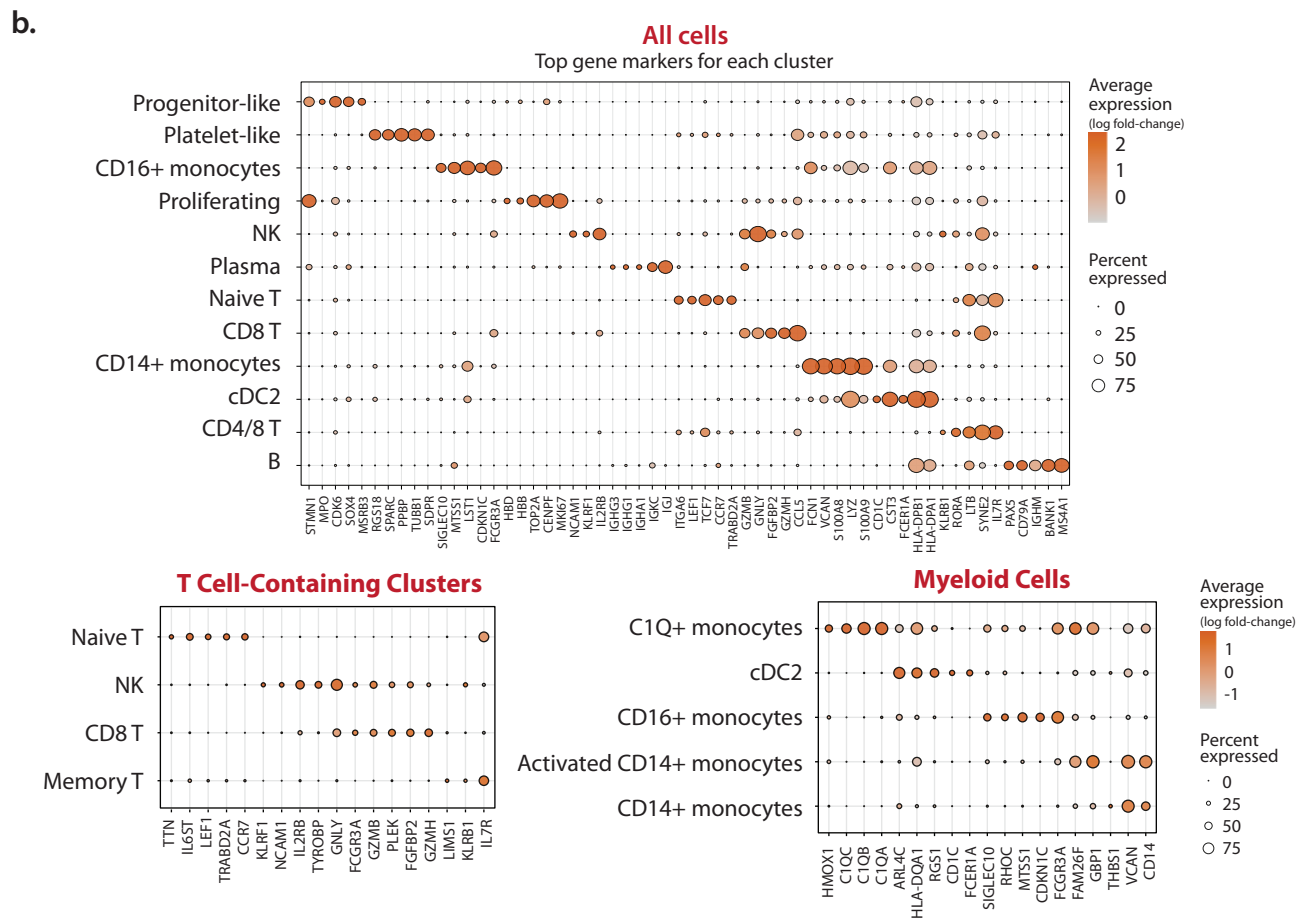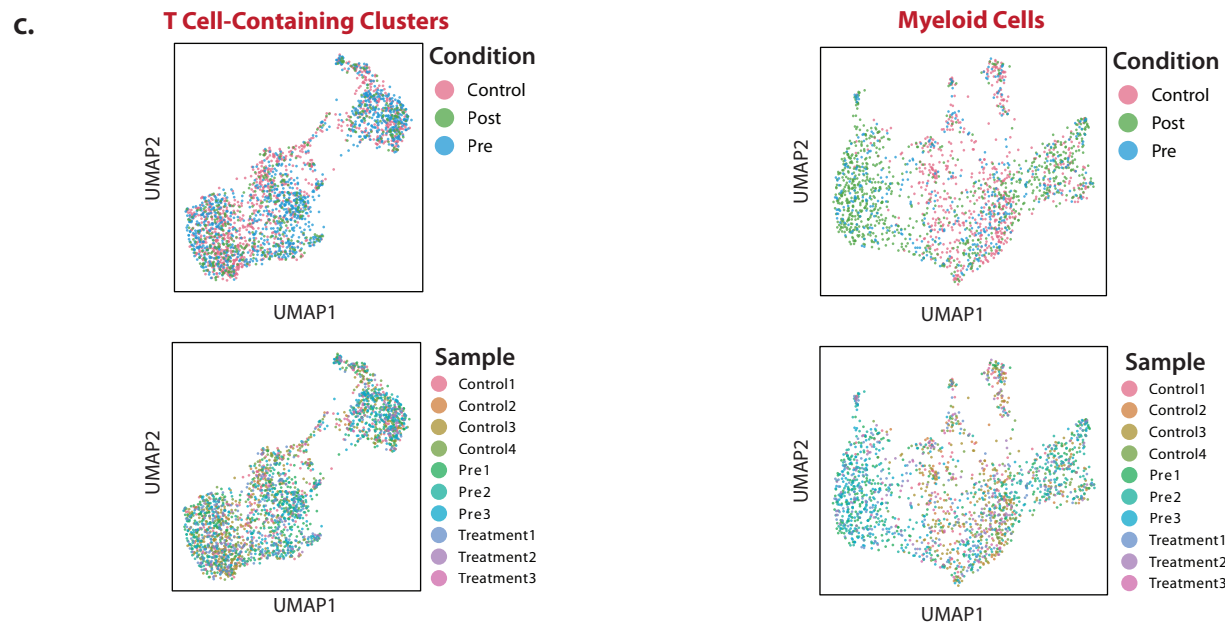

Supplemental Methods Figure 1: Single-cell RNA-sequencing cluster features, related to Figure 3

- a. Single-cell RNA-sequencing was performed on PBMCs from four different healthy controls and the patient at six different time points pre- and post-itacitinib treatment. For each sample, median unique molecular identifiers (UMIs) per cell, median genes detected per cell, and number of cells for each sample are shown.
- b. Cluster-defining genes for each cell type (top); cluster defining genes across T cell containing subclusters (bottom left); and cluster defining genes across myeloid subclusters (bottom right) are shown.
- c. T cell-containing subclusters are shown by condition (Healthy control, pre-itacitinib, or post-itacitinib) (top left) and by sample (one of four healthy controls or one of six time points from the patient) (bottom left). The same is plotted for myeloid subclusters (top right) and (bottom right).



a.

| Condition         | # of cells |
|-------------------|------------|
| Pre-itacitinib 1  | 5325       |
| Pre-itacitinib 2  | 3495       |
| Pre-itacitinib 3  | 5706       |
| Post-itacitinib 1 | 3713       |
| Post-itacitinib 2 | 5530       |

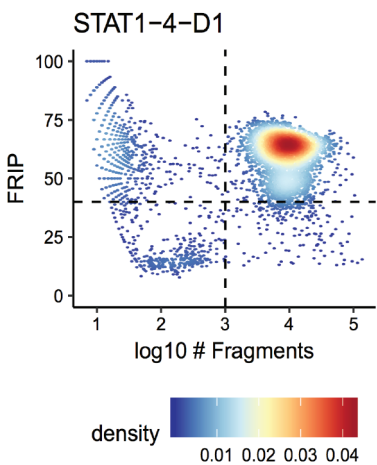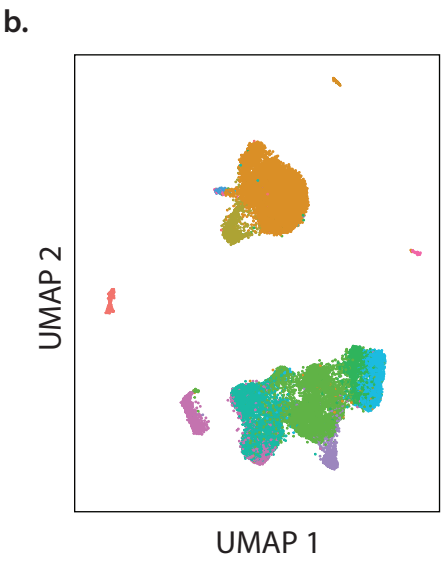

- Cell Type**
- B\_cell
  - CD14\_Monocytes
  - CD16\_Monocytes
  - CD4\_Memory
  - CD4\_Naive
  - CD8\_effector
  - CD8\_Naive
  - Dendritic\_cell
  - Double\_negative\_T\_cell
  - NK\_cell
  - pDC

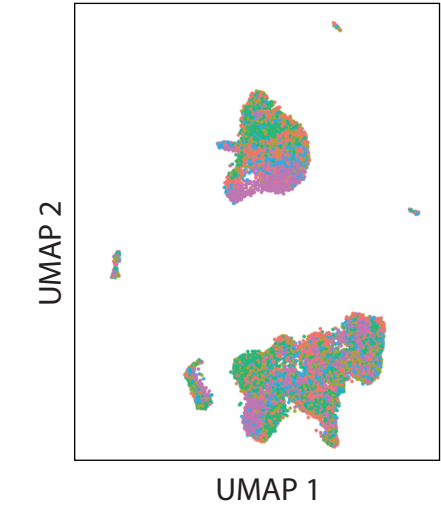

- Pre-itacitinib timepoint 1
- Pre-itacitinib timepoint 2
- Pre-itacitinib timepoint 3
- Post-itacitinib timepoint 1
- Post-itacitinib timepoint 2

Supplemental Methods Figure 2: Single-cell assay for transposase-accessible chromatin with sequencing, related to Figure 3

- a. Shown are the number of cells sequenced per time point sample (left) and a representative plot from one sample where each point is a cell plotted by log 10 number of fragments on the x-axis and by the fraction of reads in called peak regions (FRIP) on the y-axis.
- b. Clustering of cell types using scATAC-seq, plotted in UMAP space, and labeled by cell type (top) and by time-point (bottom). N = 3 pre-itacitinib time points and n = 2 post-itacitinib time points.
